# Supplementary material for: Bacterial Succession Pattern during the Fermentation Process in Whole-Plant Corn Silage Processed in Different Geographical Areas of Northern China
Source: MDPI journal article supplement (doi:10.3390/pr9050900), 2021-05-20
Supplement: s1 [file s1]

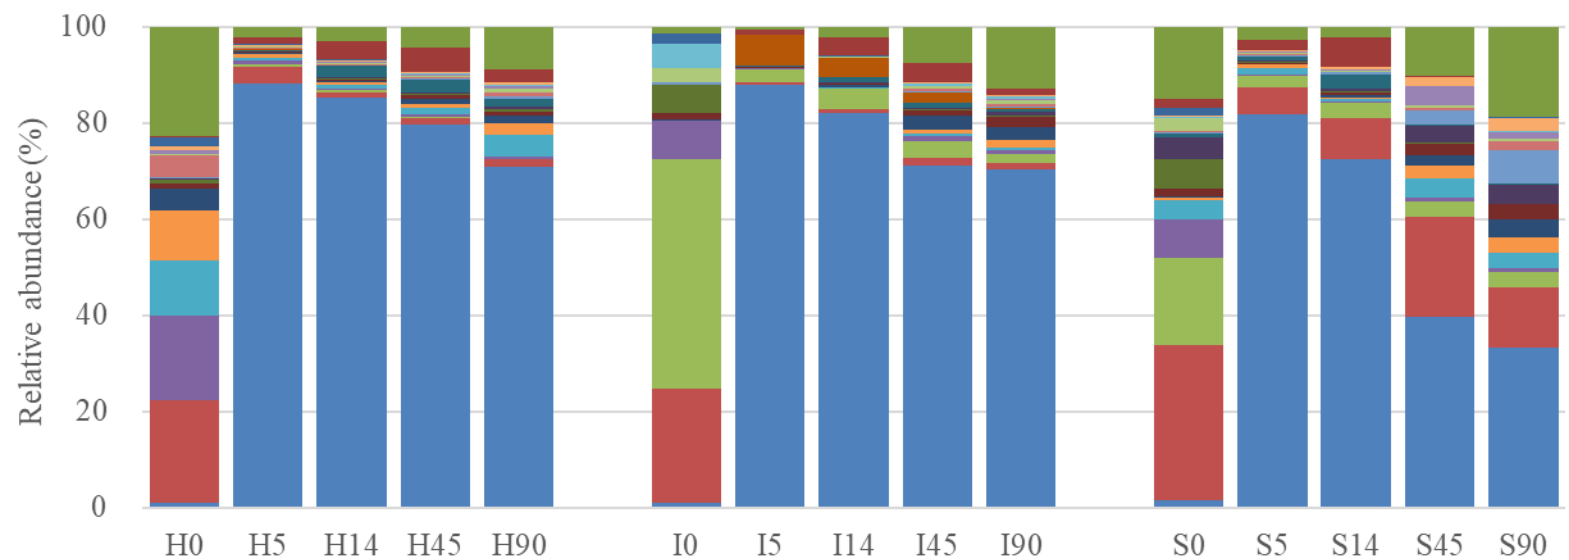

- Lactobacillus
- Lactococcus
- Sphingobacterium
- Sphingomonas
- Pantoea
- Klebsiella
- Serratia
- Pseudomonas
- Rahnella
- Gluconobacter
- Others
- Leuconostoc
- Weissella
- Stenotrophomonas
- Enterobacter
- Raoultella
- Pediococcus
- Allorhizobium-Neorhizobium-Pararhizobium-Rhizobium
- Delftia
- Achromobacter
- unclassified
