# Supplementary figures and images for: Bacterial Succession Pattern during the Fermentation Process in Whole-Plant Corn Silage Processed in Different Geographical Areas of Northern China
Source: MDPI journal article supplement (doi:10.3390/pr9050900), 2021-05-20

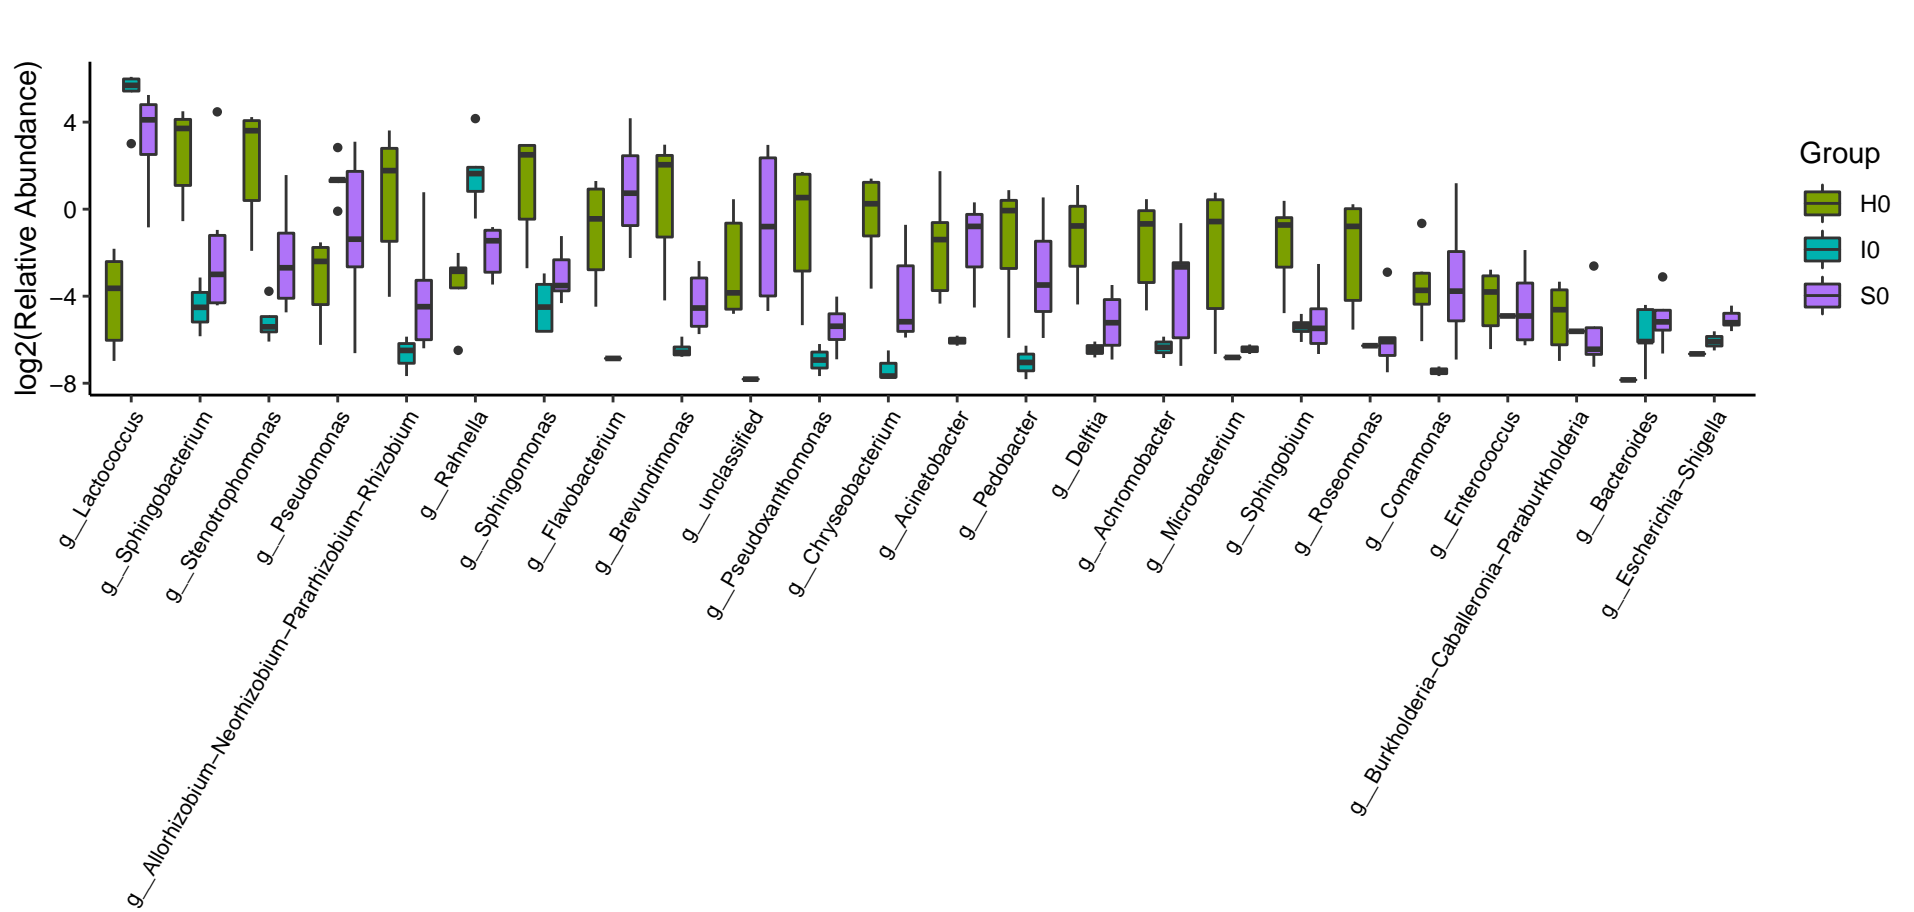

Supplement: s1 [file s1]

# PCA Analysis

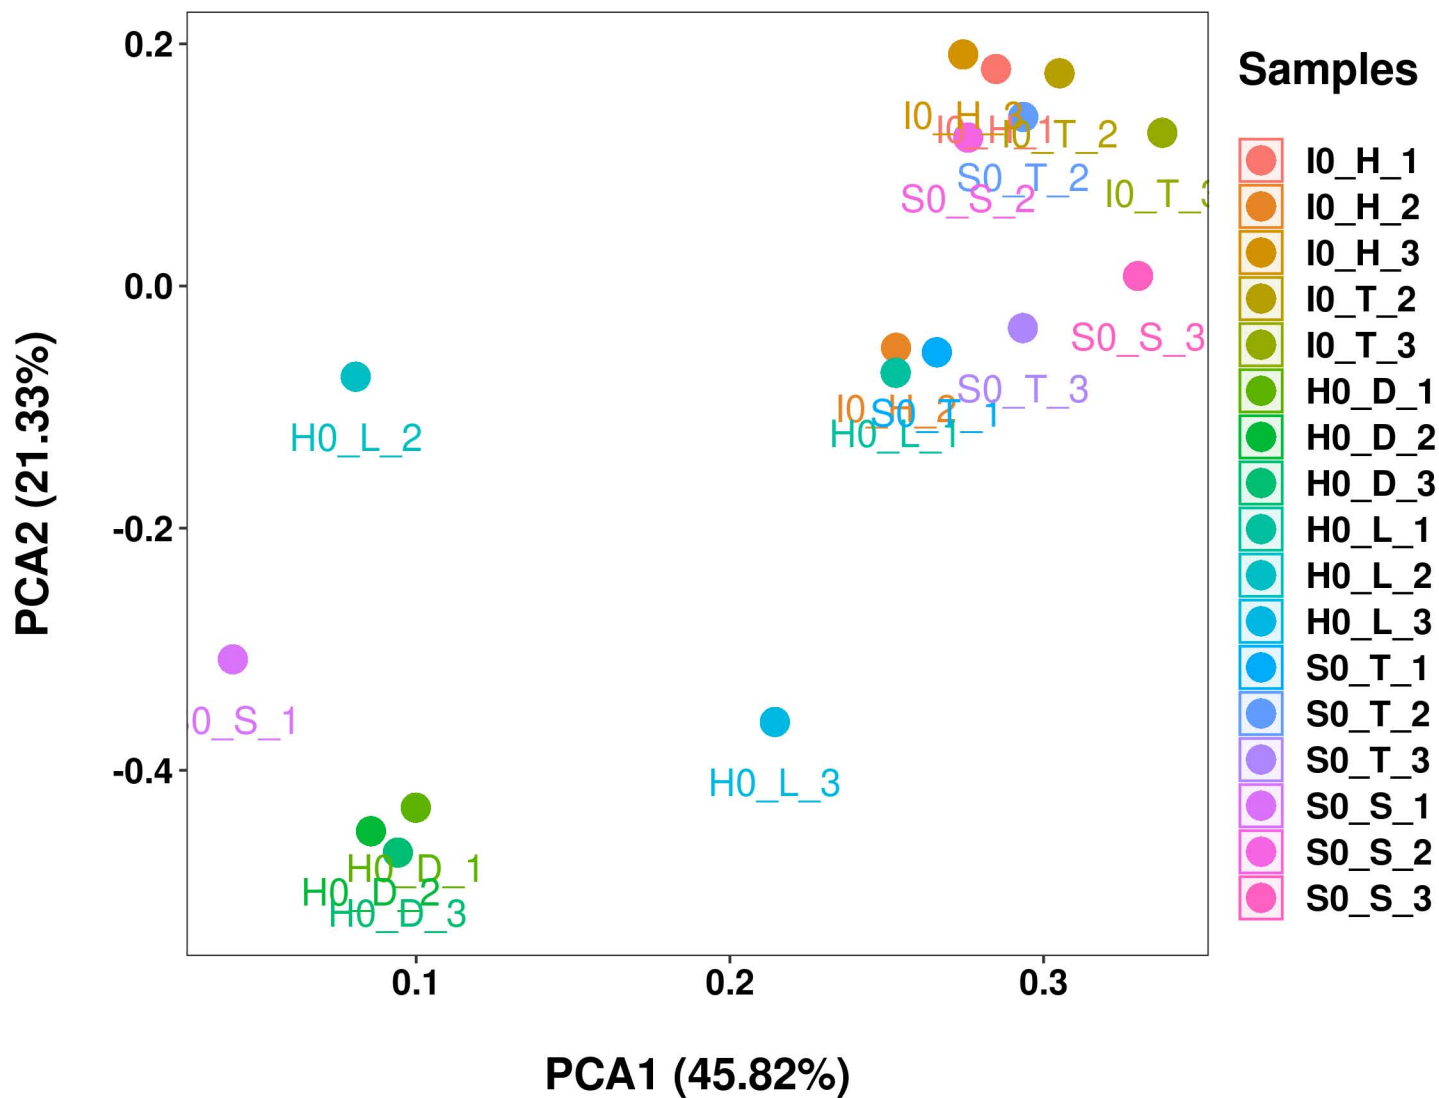

Supplement: s1 [file s1]

# PCA Analysis

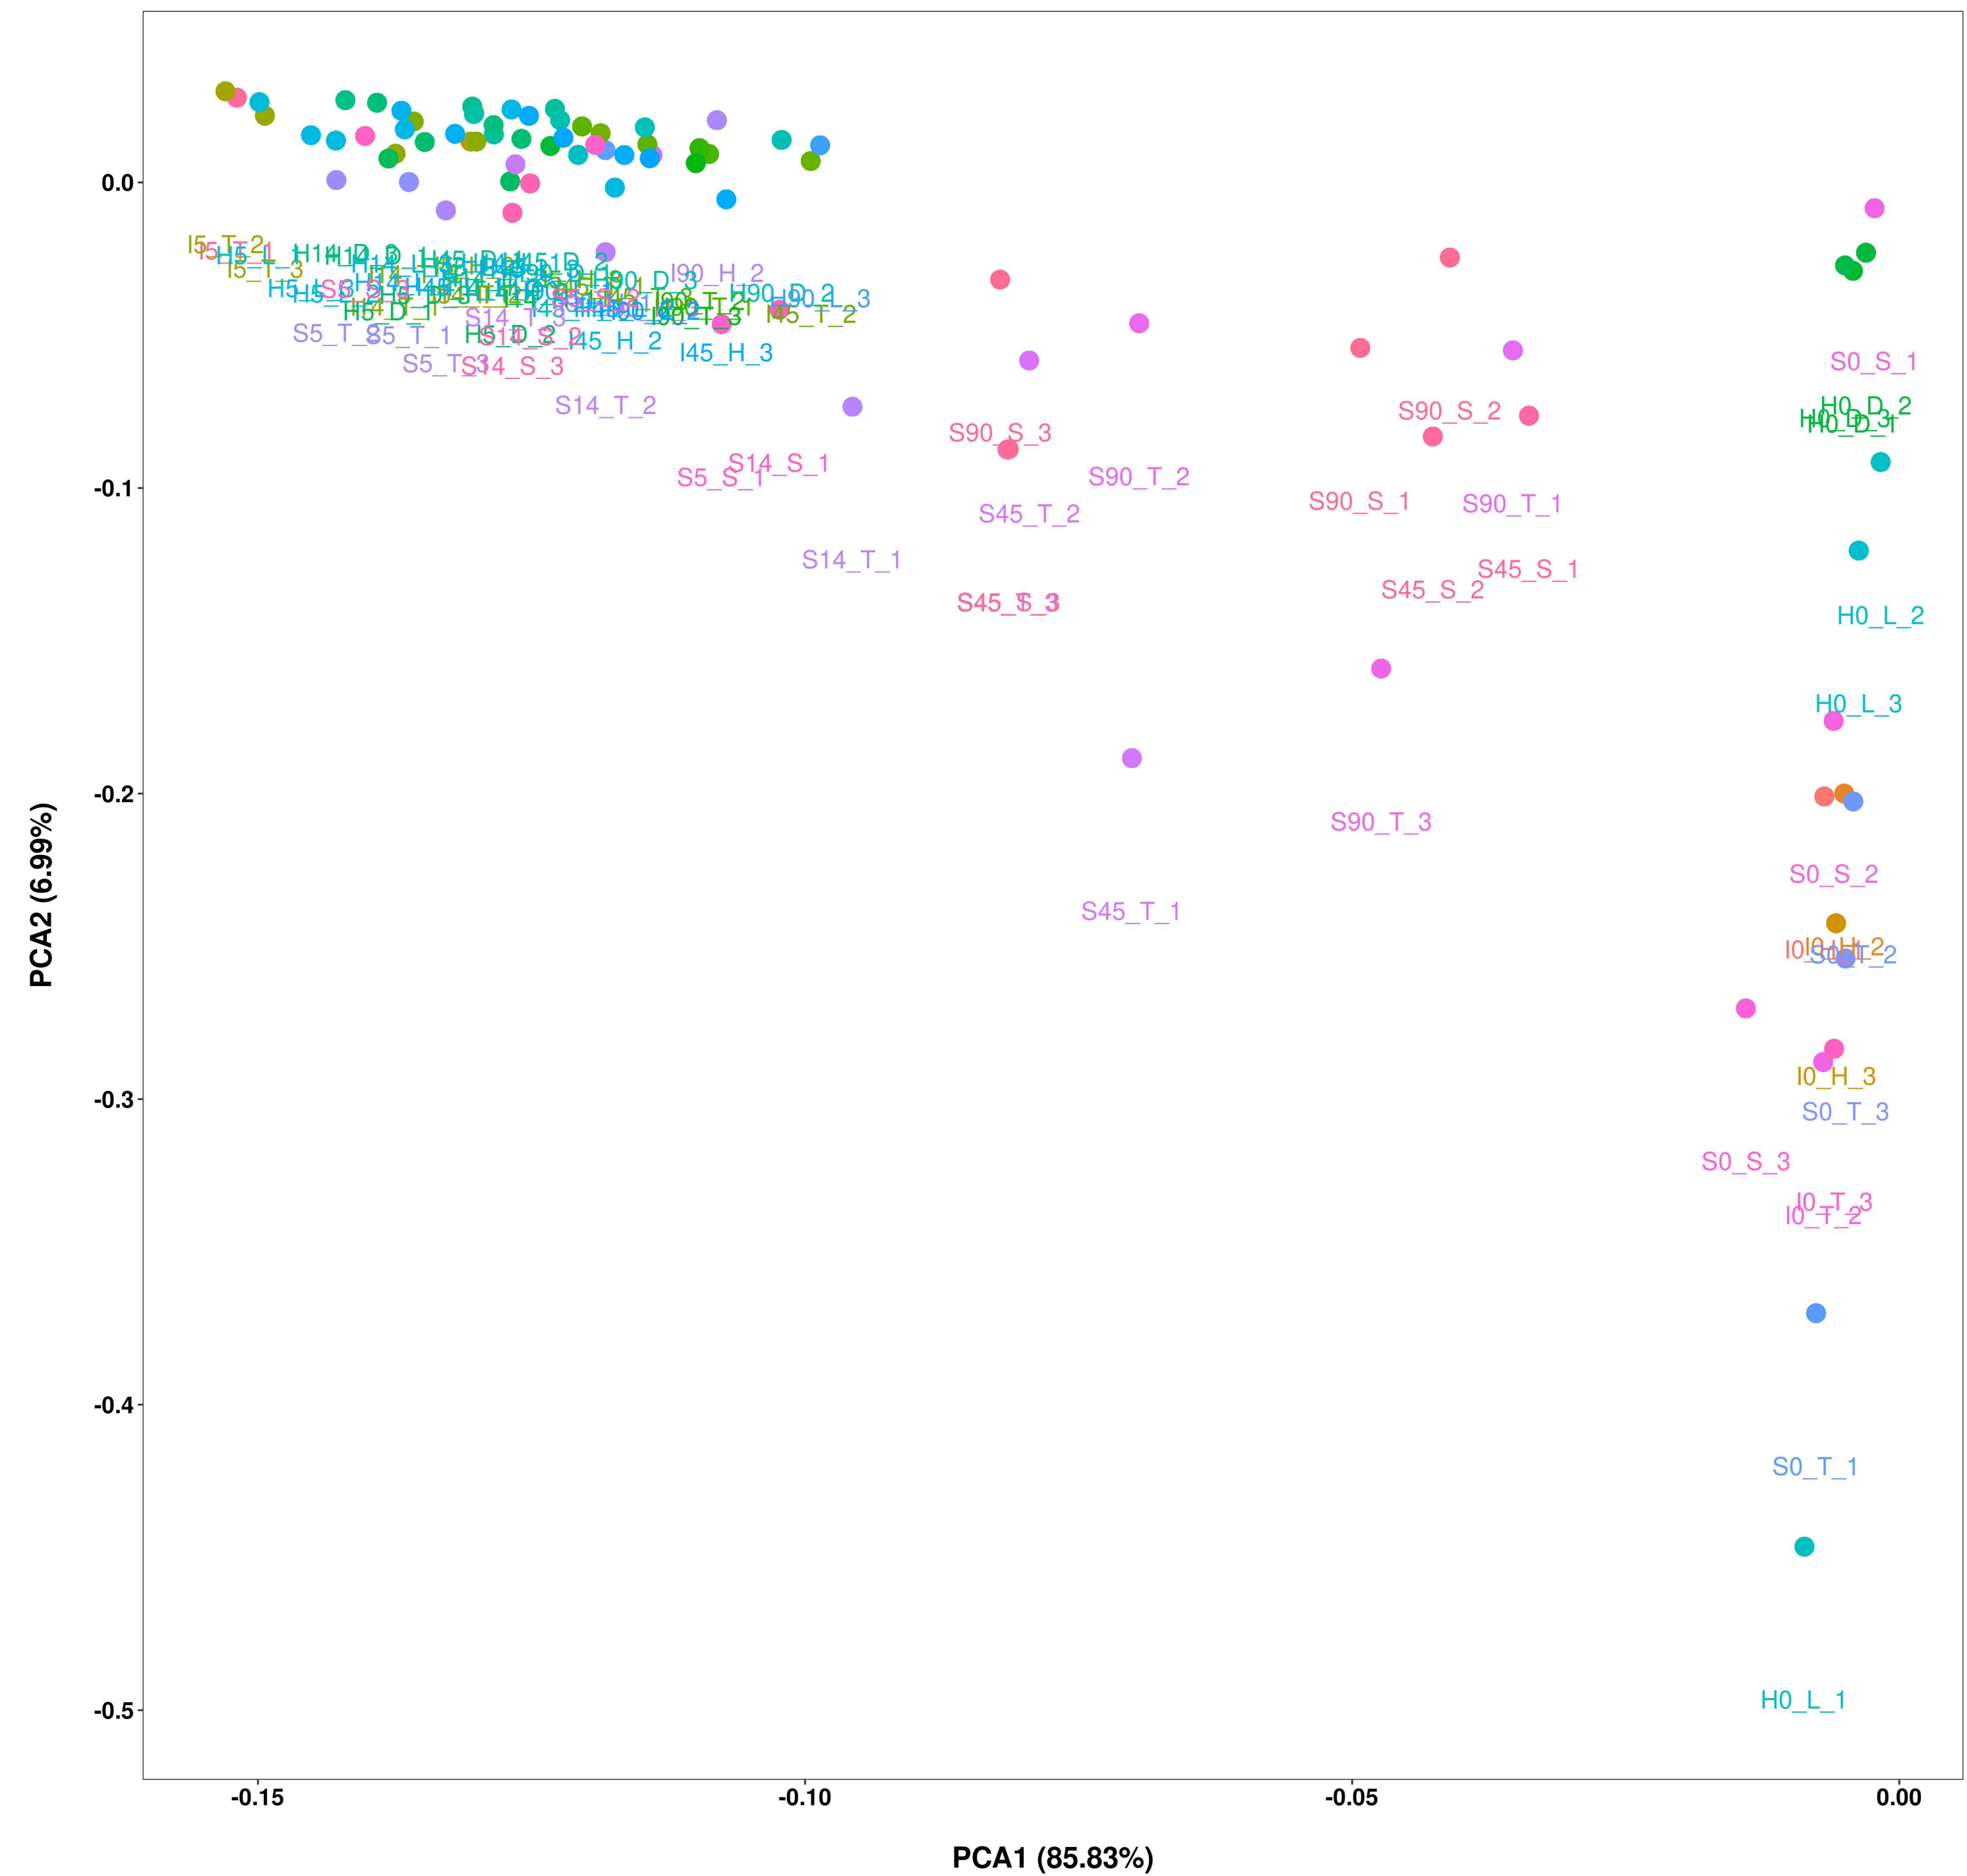

Supplement: s1 [file s1]
